# Conditions under which distributions of edge length ratios on phylogenetic trees can be used to order evolutionary events

EDWARD SUSKO<sup>1,2</sup>, MIKE STEEL<sup>3</sup> AND ANDREW J. ROGER<sup>1,4</sup>

<sup>1</sup> *Centre for Comparative Genomics and Evolutionary Bioinformatics, Dalhousie University*

<sup>2</sup> *Department of Mathematics and Statistics, Dalhousie University,*

*Halifax, Nova Scotia, Canada B3H 4R2*

<sup>3</sup> *Biomathematics Research Centre, University of Canterbury, Christchurch, New Zealand 8041*

<sup>4</sup> *Department of Biochemistry and Molecular Biology, Dalhousie University,*

*Halifax, Nova Scotia, Canada B3H 4R2*

*Corresponding Author: Edward Susko, Department of Mathematics and Statistics, Dalhousie University, Halifax, Nova Scotia, Canada B3H 3J5; Phone: (902) 494-8865; Fax: (902) 494-5130; E-mail: edward.susko@gmail.com*

## Abstract

Two recent high profile studies have attempted to use edge (branch) length ratios from large sets of phylogenetic trees to determine the relative ages of genes of different origins in the evolution of eukaryotic cells. This approach can be straightforwardly justified if substitution rates are constant over the tree for a given protein. However, such strict molecular clock assumptions are not expected to hold on the billion-year timescale. Here we propose an alternative set of conditions under which comparisons of edge length distributions from multiple sets of phylogenies of proteins with different origins can be validly used to discern the order of their origins. We also point out scenarios where these conditions are not expected to hold and caution is warranted.

## Main

The origin of eukaryotic cells from prokaryotic precursors - eukaryogenesis - remains one of the more mysterious major evolutionary transitions in the history of life on Earth. This transition involved a host cellular lineage related to asgard Archaea (Eme *et al.* 2017) that, at some point prior to the last eukaryotic common ancestor (LECA), took up an endosymbiotic alphaproteobacterium that became the mitochondrion, an integrated energy-producing organelle within eukaryotic cells (Dacks *et al.* 2016; Roger *et al.* 2017; Porter 2020). Genes in LECA, therefore, have multiple possible origins: either they were inherited from the host lineage, acquired from the mitochondrial symbiont by endosymbiotic gene transfer, transferred from potentially many other prokaryotic donors by lateral gene transfer (Rochette *et al.* 2014; Pittis and Gabaldón 2016a), or arose *de novo* during eukaryogenesis. Regardless of their origin, many genes were extensively duplicated during this period, as many new cellular traits including the cytoskeleton, nucleus, endomembrane system evolved

29 in the proto-eukaryote lineage. Determining the order of these events remains a major  
30 roadblock in our understanding of eukaryogenesis.

31 In 2016, Pittis and Gabaldón introduced a novel approach to approximating the relative  
32 ages of genes of different origins that were acquired during eukaryogenesis (Pittis and Ga-  
33 baldón 2016a). The approach relies on the notion that edge lengths on phylogenetic trees  
34 estimated from aligned genes or proteins, represent expected numbers of amino acid substi-  
35 tutions along the edge and are proportional to the product of rates of substitution along the  
36 edge and the time span of the edge. Under a strict molecular clock assumption the relative  
37 lengths of edges are proportional to time spans of the edges.

38 To characterize the relative timespan a gene has been resident in the proto-eukaryote  
39 lineage prior to LECA, Pittis and Gabaldón focused on the edge in each gene tree between  
40 the LECA node and the node representing the common ancestor of the closest prokaryotic  
41 sister group and the eukaryote lineage (Fig. 1), an edge they call the stem the length of  
42 which is denoted here as  $L_s$ . All genes from the same origin,  $O$ , are expected to have a  
43 stem edge that corresponds to the same time span ( $T_{s*}^g$  is constant for  $g \in O$ ). A serious  
44 complication arises here almost immediately. For genes in the proto-eukaryote genome that  
45 were inherited from its common ancestor with the closest sampled asgard archaeon, the  
46 time span of the stem edge in the protein tree  $T_s^g$  is the same as the timespan it has been  
47 resident during eukaryogenesis,  $T_{s*}^g$ . However, for genes that were laterally acquired during  
48 eukaryogenesis either *via* the mitochondrial symbiont or from other prokaryotic sources,  $T_s^g$   
49 is expected to be larger than  $T_{s*}^g$  (Fig. 1). This is because the sampled taxa are unlikely  
50 to include representatives from the actual immediate prokaryotic sister group of the donor  
51 lineage of the gene(s). Reasons for this include inadequacy in sampling of living prokaryote  
52 lineages but, more likely, it is because the actual sister group, as opposed to the sampled  
53 one, went extinct. In what follows, we assume that for all comparisons  $T_s^g \approx T_{s*}^g$ , but it  
54 is important to recognize the caveats accompanying conclusions coming from stem-length  
55 methods applied to comparisons amongst acquired genes. For instance, a claim that the  
56 time of acquisition of a group  $B$  is earlier than that of an acquired group  $A$ , is more directly  
57 an inference that the closest sampled sister lineage of group  $B$  diverged earlier than that of  
58 group  $A$ .

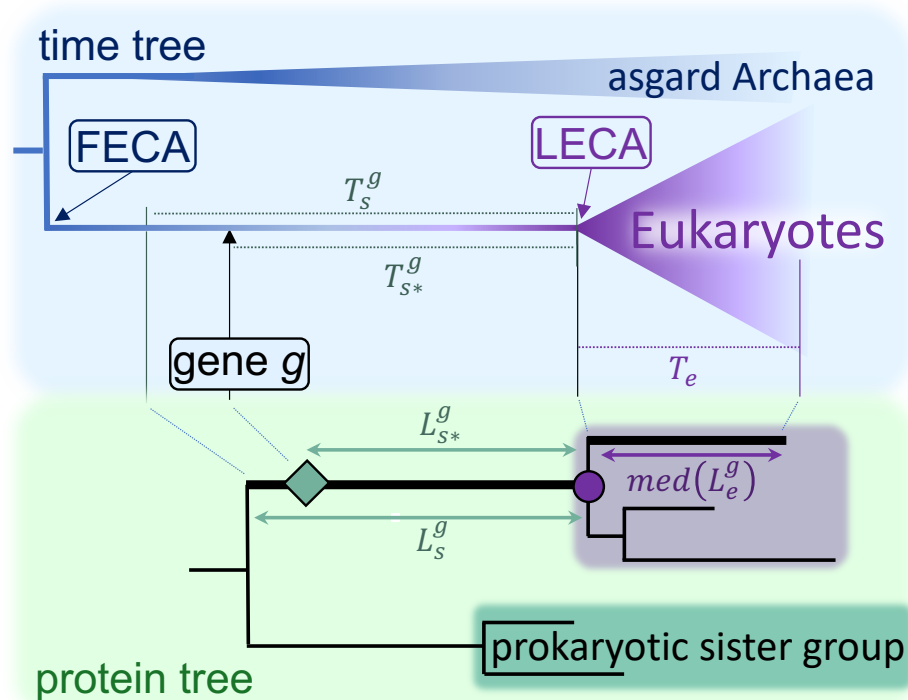

Figure 1: **The correspondence between edges on the phylogeny of a gene acquired during eukaryogenesis and edges on the geological time tree of life.** The top tree (blue box) shows the part of the geological tree of life depicting the closest asgard archaeal sister group relationship with the 'host' lineage of eukaryotes. FECA represents the *first eukaryotic common ancestor* and LECA is the *last eukaryotic common ancestor*. At some point along the eukaryogenesis edge between FECA and LECA, gene  $g$  was acquired by the proto-eukaryote genome from a prokaryotic lineage. The timespan that gene  $g$  was present during eukaryogenesis was  $T_{s*}^g$  and from LECA to the present is  $T_e$ . Below (green box) is the estimated phylogeny of protein  $g$  and its orthologs. The length of the stem edge is  $L_s^g$  and corresponds to timespan  $T_s^g$  in the time tree. The length of the segment of the latter edge post-acquisition by the proto-eukaryote lineage (green diamond to purple circle) is  $L_{s*}^g$  and corresponds to timespan  $T_{s*}^g$ . Note that  $T_s^g$  is an upper bound on the timespan of the desired stem edge post-acquisition,  $T_{s*}^g$ , because any gene transfer to the proto-eukaryote from a prokaryotic source must have occurred after speciation of the donor lineage from its closest sampled extant sister group. This discrepancy between the time of origin of a gene and timespan of its stem edge only occurs for genes acquired during eukaryogenesis (e.g. mitochondrial and other laterally acquired genes). The median length of all possible paths between the LECA node (purple circle) and eukaryote leaf node is  $med(L_e^g)$ . The normalized stem length,  $sl^g = L_s^g / med(L_e^g)$ .

59 To remove the effect of different overall rates of evolution in different genes,  $R_g$ , Pittis and  
60 Gabaldón normalize the original (raw) stem edge length, by a path length,  $L_e$ , for a path,  
61  $e$  ( $e$  for eukaryote), that corresponds to a constant time span over genes, denoted  $T_e$ , giving  
62 the time from LECA to the present (Fig. 1). This path length is the sum of consecutive edge  
63 lengths over all edges  $j$  in the path,  $L_e = \sum_{j \in e} L_j$ . Because for a given protein tree there  
64 are multiple paths from LECA to the present, and to exclude potential outliers, the path of  
65 median length was chosen as the normalization factor so that the normalized stem length is:  
66  $sl_g = L_s^g / \text{med}(L_e^g)$ . Following Pittis and Gabaldón, we refer to  $sl_g$  as a 'stem length' even  
67 though it is actually a normalized edge length.

68 Under the molecular clock model, for any path  $p$ ,  $L_p = R_g T_p$ , where  $T_p$  is the accumulated  
69 time for the path and  $R_g$  is the rate of substitution that is constant over time but may vary  
70 across genes. Thus, under the molecular clock model, the stem length satisfies that

$$71 \quad sl_g = R_g T_s / \text{med}(R_g T_e) = T_s^g / T_e$$

72 Pittis and Gabaldón (2016a) compared the distributions of estimated stem lengths,  $\hat{sl}_g$  for  
73 proteins of different origins. They found that  $\hat{sl}_g$  distributions from archaeal origin proteins  
74 ( $g \in R$ ) were, based on Mann-Whitney U tests, significantly shifted to be larger than those of  
75 bacterial ( $g \in C$ ) origin which were, in turn, significantly greater than alphaproteobacterial  
76 proteins ( $g \in M$ ) (the latter are assumed to correspond to genes that originated with the  
77 mitochondrial symbiont). Since the times are constant within groups (for instance,  $T_s^g = T_s^R$   
78 for  $g \in R$ ), they interpret this as evidence that  $T_s^R > T_s^C > T_s^M$ . An important conclusion  
79 of their study was, therefore, that the mitochondrial symbiosis took place much later in eu-  
80 karyogenesis than suggested in mitochondria early hypotheses (e.g., Lane and Martin 2010).  
81 More recently, Vosseberg and colleagues (Vosseberg *et al.* 2020) have extended this approach  
82 to address the relative timings of the mitochondrial symbiosis and gene duplication events  
83 for a variety of functional classes of protein families that expanded during eukaryogenesis.

84 Pittis and Gabaldón's approach was strongly criticized by Martin and colleagues (Martin  
85 *et al.* 2017) who argued that the results were meaningless because the method depends  
86 on the assumption that a molecular clock should hold over evolutionary time spans on  
87 the billion-year time scale. They investigated a number of the individual phylogenies from  
88 Pittis and Gabaldón study and showed that variation in edge lengths within gene trees  
89 were substantial and not consistent with a molecular clock. Pittis and Gabaldón have since  
90 countered by arguing that their approach does not assume a molecular clock and demonstrate  
91 its ability to successfully recover correct orderings of more recent evolutionary divergences in  
92 eukaryotes (Pittis and Gabaldón 2016b). However, they did not provide a detailed theoretical  
93 justification for why the method should give reliable evolutionary orderings in the absence

94 of a molecular clock

95 Here we show that assuming a molecular clock is not necessary for the method to work. In  
96 what follows, we will show that if proteins  $a$  and  $b$  in two groups  $a \in A$  and  $b \in B$  of different  
97 origins evolve independently according to the same time-dependent stochastic substitution  
98 rate process, the distributions of the normalized stem lengths of phylogenies of proteins  $B$   
99 will be systematically larger than  $A$ , i.e.  $\mathbb{P}[sl_b - sl_a > 0] > 1/2$ , if and only if  $T_s^B > T_s^A$ . We  
100 show that restrictions on the stochastic substitution rate process and the data set required  
101 for the foregoing result to hold are surprisingly few, but do include a requirement that there  
102 are no systematic differences between groups  $A$  and  $B$  at any given time point. This result  
103 is shown to hold even when estimation of edge lengths is taken into account, although a  
104 modified version of the Mann-Whitney U test will be required for testing when the variances  
105 in edge length estimates are systematically different between the groups. We also show that  
106 these methods will work in cases in which the proteins within the groups being compared  
107 have ranges of different ages. In the latter cases, however, we suggest that statistical test  
108 rejection is difficult to meaningfully interpret. Finally, we outline scenarios in which the  
109 required assumptions of the method will not hold and caution is warranted.

110 Borrowing on relaxed molecular clock theory that assumes that the rate of substitution  
111 varies stochastically over the tree (Bromham *et al.* 2019), suppose that the rate of substitu-  
112 tion at any point along a path  $p$  can be represented as  $R_g r_p^g(t)$ , where  $\{r_p^g(t)\}$  is a continuous  
113 time stochastic process ( $R_g$  is the overall fixed rate of gene  $g$  as before). Assuming a con-  
114 ventional Markov substitution model, the probability of substituting state  $i$  with state  $j$  in  
115  $(t, t+h]$  is  $q_{ij} R_g r_p(t) h + o(h)$ , for some state transition rate  $q_{ij}$ . Some constraint is required to  
116 identify parameters and we assume, without loss of generality, that  $E[R_g] = 1$  as well as the  
117 conventional constraint,  $\sum_i \sum_{j \neq i} \pi_i q_{ij} = 1$ . Since the chance of two or more substitutions is  
118 small relative to  $h$ ,  $o(h)$ , the expected number of substitutions in  $(t, t+h]$ ,  $E[N(t, t+h)]$ , is  
119  $\sum_i \sum_{j \neq i} \pi_i q_{ij} R_g r_p(t) h + o(h) = R_g r_p(t) h + o(h)$ . Taking  $u_0 = 0, u_1 = t_0/N, \dots, u_N = t_0$ , the  
120 number of substitutions in the time period  $(0, t_0]$  is the sum,  $\sum_{k=1}^N N(u_{k-1}, u_k)$  of the substi-  
121 tutions over the intervals  $(0, u_1], \dots, (u_{N-1}, u_N]$ . Since this is true for any  $N$ , the expected  
122 number of substitutions along path  $p$  and over time period  $(0, t_0]$  is

$$\begin{aligned} E[N(0, t_0)] &= \lim_N \sum_{k=1}^N E[N(u_{k-1}, u_k)] \\ &= \lim_N \left\{ \sum_{k=1}^N R_g r_p(u_{k-1}) t_0/N + N o(1/N) \right\} = R_g \int_0^{t_0} r_p(t) dt. \end{aligned}$$

123

124 Thus the stem length for protein  $g$  is

$$125 \quad sl_g = \int_{T_e}^{T_s+T_e} r_s^g(t) dt / \text{med} \left( \int_0^{T_e} r_e^g(t) dt \right)$$

126 Suppose that comparison is between group  $A$  and  $B$  and that  $T_s^B > T_s^A$ . Let

$$127 \quad Y_g = \text{med} \left( \int_0^{T_e} r_e^g(t) dt \right), \quad X_g = \int_{T_e}^{T_s^A+T_e} r_s^g(t) dt \quad \text{and} \quad V_g = \int_{T_s^A+T_e}^{T_s^B+T_e} r_s^g(t) dt. \quad (1)$$

128 Then  $sl_g = X_g/Y_g$  for  $g \in A$  and  $sl_g = (X_g + V_g)/Y_g$  for  $g \in B$ .

129 We now make the assumption that for any given path  $p$  and any two proteins  $g$  and  $g'$   
130 in  $A \cup B$ , the rate processes are probabilistically equivalent on  $[0, T_s^A]$ :

131 For any  $0 \leq t_1 < \dots < t_m \leq T_s^A$ , the joint probability distribution of  $[r_p^g(t_1), \dots, r_p^g(t_m)]$  and  
132  $[r_p^{g'}(t_1), \dots, r_p^{g'}(t_m)]$  are the same.

133 Note that this assumption allows possibly radical rate changes throughout the tree and  
134 across proteins. Moreover, the rate processes need not be stationary nor Markov processes.  
135 What is required, however, is that there be no systematic differences between the two groups.  
136 Thus, for instance, the model allows that as a consequence of a radical environmental change  
137 or change in population size at time  $t$ , for some particular lineage  $l$ , the distribution of  $r_l^g(t)$   
138 is skewed to the right of the distribution of the rate  $r_l^g(t')$  at some other time  $t'$ . But that  
139 difference in distributions is expected to apply whether  $g \in A$  or  $g \in B$ . For simplicity, we  
140 also make the assumption that the rate process is bounded such that  $r_p^g(t) \in [\beta, \gamma]$  for  
141 some  $\beta > 0$  and  $\gamma < \infty$ . This assumption is reasonable as we do not expect substitution  
142 rates to go to 0 or to increase without bound. In any case, this assumption can be loosened  
143 but some sort of assumption is required to avoid having a stem lengths that are almost 0  
144 due entirely to having extremely low average rates along the stem or extremely high average  
145 rates from LECA to present. Finally, we assume that the rate processes are independent  
146 over genes.

147 With the assumptions above, if the eukaryotic taxa sampled are the same for groups  
148  $A$  and  $B$ , then  $Y_g$  will have the same distribution whether  $g \in A$  or  $g \in B$ . Note that in  
149 Pittis and Gabaldón the same taxa were not necessarily present in any two groups of proteins  
150 being compared. We argue below that, for the approach to work, it is best if  $Y_g$  has the same  
151 distribution for  $g \in A$  or  $g \in B$ , otherwise differences in normalized stem lengths between  
152 the groups may be due to unusual rates for eukaryote taxa present in one group but not the  
153 other. Thus, it may be desirable to take means or medians over the set of eukaryote taxa  
154 present in both groups. Nevertheless, medians are not as likely to be affected by outlying  
155 rates (which was one of the original motivations for using them), so if taxon sampling is

comparable for the two groups, the distributions of  $Y_g$  are expected to be approximately the same for the two groups under the assumptions above.

Consider now  $\mathbb{P}[sl_b - sl_a > u]$  for fixed  $u$ ,  $a \in A$  and  $b \in B$ . In terms of the random variables above this can be expressed as  $\mathbb{P}[U + V_b/Y_b > u]$  where  $U = X_b/Y_b - X_a/Y_a$ . Since  $r_p^g(t) \in [\beta, \gamma]$ , the smallest  $V_b/Y_b$  could be is  $w := \beta(T_s^B - T_s^A)/(\gamma T_e) > 0$ . Thus

$$\mathbb{P}[sl_b - sl_a > u] \geq \mathbb{P}[U + w > u] = \mathbb{P}[U > u - w] \quad (2)$$

Similarly

$$\mathbb{P}[sl_a - sl_b \geq u] = \mathbb{P}[-U - V_b/Y_b \geq u] \leq \mathbb{P}[-U - w \geq u] = \mathbb{P}[-U \geq u + w] \quad (3)$$

With the assumptions above  $X_b/Y_b$  and  $X_a/Y_a$  have the same distribution. Thus  $U = X_b/Y_b - X_a/Y_a$  has a symmetric distribution around 0. Consequently,

$$\mathbb{P}[sl_a - sl_b \geq u] \leq \mathbb{P}[U \geq u + w] \leq \mathbb{P}[U > u - w] \leq \mathbb{P}[sl_b - sl_a > u] \quad (4)$$

where the first inequality is from (3) and the third from (2). The inequalities are strict unless  $U$  does not have mass in  $(u - w, u + w]$ . Since  $X_b/Y_b$  and  $X_a/Y_a$  have the same distribution then  $U$  is sure to have positive probability in  $(-w, w)$ . Thus with  $u = 0$  and since  $\mathbb{P}[sl_a - sl_b \geq 0] = \mathbb{P}[sl_b - sl_a \leq 0] = 1 - \mathbb{P}[sl_b - sl_a > 0]$ , then we have

$$0 < \mathbb{P}[sl_b - sl_a > 0] - \mathbb{P}[sl_a - sl_b \geq 0] = 2\mathbb{P}[sl_b - sl_a > 0] - 1 \quad (5)$$

or  $\mathbb{P}[sl_b - sl_a > 0] > 1/2$ .

We have shown that under the alternative hypothesis that  $T_s^B > T_s^A$  then we have that  $\mathbb{P}[sl_b - sl_a > 0] > 1/2$ . Under the null hypothesis that  $T_s^B = T_s^A$ , the distributions of  $sl_b$  and  $sl_a$  are the same. Thus if the actual normalized stem lengths were used for the two groups, the null and alternative hypotheses of interest imply the null and alternative hypotheses of the Mann-Whitney U test. However, the actual stem lengths are not known for the two groups; only estimates of these quantities from sequence data are available. This raises the question: Will the null and alternative hypotheses  $T_s^B = T_s^A$  and  $T_s^B > T_s^A$  correspond to Mann-Whitney U test null and alternative hypotheses if estimated stem length distributions are used?

Assume that the number of sites is sufficiently large for each gene that asymptotic likelihood theory gives a good approximation to the sampling distributions of the stem lengths. That theory implies that  $\hat{L}_p^g$  is approximately normal with mean  $L_p^g$ . It follows from delta-method arguments (cf. §5.3.2 of Bickel and Doksum 2007) that  $\hat{L}_s^g/\hat{L}_e^g$  is approximately normal with mean  $L_s^g/L_e^g$  for any path  $e$  from LECA to a eukaryotic taxon. Because there

187 are finitely many paths, for relatively large sequence lengths, the path,  $e^*$  say, corresponding  
 188 to the median  $\hat{L}_e^g$  should coincide with the path corresponding the median  $L_e^g$ . Thus  $\hat{sl}_g$  will  
 189 be  $\hat{L}_s^g/\hat{L}_{e^*}^g$  for the path  $e^*$  corresponding to the median  $L_e^g$ . Since  $\hat{L}_s^g/\hat{L}_{e^*}^g$  is approximately  
 190 normal with mean  $L_s^g/L_{e^*}^g$ ,  $\hat{sl}_g = sl_g + \epsilon_g$  where  $\epsilon_g$  has a normal distribution that is sym-  
 191 metric around 0. Consequently  $\mathbb{P}[\hat{sl}_b - \hat{sl}_a > 0] = \mathbb{P}[sl_b - sl_a > \epsilon_b - \epsilon_a]$ . As a difference  
 192 of independent, symmetric normals,  $\epsilon_b - \epsilon_a$  is symmetric normal. Denote the probability  
 193 density function of the latter as  $p(u)$ . Then

$$\begin{aligned}
 194 \quad \mathbb{P}[\hat{sl}_b - \hat{sl}_a > 0] &= \int_{-\infty}^{\infty} \mathbb{P}[sl_b - sl_a > u] p(u) du \\
 195 &= \int_0^{\infty} \mathbb{P}[sl_b - sl_a > u] p(u) du + \int_{-\infty}^0 \mathbb{P}[sl_b - sl_a > u] p(u) du \\
 196 &= \int_0^{\infty} \mathbb{P}[sl_b - sl_a > u] p(u) du + \int_{-\infty}^0 \mathbb{P}[sl_a - sl_b < -u] p(u) du \\
 197 &= \int_0^{\infty} \{\mathbb{P}[sl_b - sl_a > u] + \mathbb{P}[sl_a - sl_b < u]\} p(u) du \\
 198 &= \int_0^{\infty} \{\mathbb{P}[sl_b - sl_a > u] + 1 - \mathbb{P}[sl_a - sl_b \geq u]\} p(u) du \quad (6)
 \end{aligned}$$

199 By (4), under the alternative hypothesis,  $\mathbb{P}[sl_b - sl_a > u] - \mathbb{P}[sl_a - sl_b \geq u] \geq 0$  with strict  
 200 inequality in a neighbourhood of 0. Thus

$$201 \quad \mathbb{P}[\hat{sl}_b - \hat{sl}_a > 0] > \int_0^{\infty} p(u) du = 1/2 \quad (7)$$

202 We see that the alternative hypothesis of interest corresponds to  $\mathbb{P}[\hat{sl}_b - \hat{sl}_a > 0] > 1/2$   
 203 as required for the Mann-Whitney U test. However, the situation under the null is a little  
 204 more problematic. Under the null hypothesis,  $\mathbb{P}[sl_b - sl_a > u] - \mathbb{P}[sl_a - sl_b \geq u] \leq 0$ , so (6)  
 205 gives that

$$206 \quad \mathbb{P}[\hat{sl}_b - \hat{sl}_a > 0] \leq \int_0^{\infty} p(u) du = 1/2$$

207 However, the Mann-Whitney U test requires that the distributions of  $\hat{sl}_b$  and  $\hat{sl}_a$  be the  
 208 same. Although the distributions of the  $sl_a$  and  $sl_b$  are the same and the distributions of  
 209  $\epsilon_a$  and  $\epsilon_b$  are both symmetrically normal, their variances need not be comparable. These  
 210 variances reflect precision of estimation and reasons that they might differ include that  
 211 numbers of sites in alignments tend to differ substantially for one group versus the other.  
 212 The null distribution used by the Mann-Whitney U test is not correct in such settings.  
 213 Indeed, Kyusa (2000) shows that if the distributions for the two groups considered by the  
 214 Mann-Whitney test are normal but with differing variances, the type I error of the test can  
 215 be inflated. Nevertheless, Chung and Romano (2015) provide an alternative test that can



216 be used under the null hypothesis,  $\mathbb{P}[\widehat{sl}_b - \widehat{sl}_a > 0] \leq 1/2$  but  $\widehat{sl}_b$  and  $\widehat{sl}_a$  do not have the  
217 same distribution and we recommend use of this test as a safeguard. That being said, if the  
218 variability of estimation is comparable for the two groups, a Mann-Whitney U test should  
219 give reasonable results.

220 Much of the preceding discussion considers a case arising in both the analyses of Pittis and  
221 Gabaldón (2016a), and Vosseberg and colleagues (2020) where the times of origin associated  
222 with a stem length are constant for proteins within a group (for instance because they all  
223 derived from a mitochondrial symbiont or were all inherited from the archaeal host). Pittis  
224 and Gabaldón, and Vosseberg and colleagues, however, also compared groups made up of  
225 proteins of different bacterial origins and considered functional classes of proteins as groups.  
226 In these cases, proteins within a group are not expected to have a single time of origin (i.e.,  
227  $T_s^g$  will vary within a group).

228 To allow for stem times that are not constant within groups, we assume a model in which  
229  $T_s^g$  are independent across genes and independent of the rate variation processes  $r_p^g(t)$ . With  
230 the previous assumptions, the null hypothesis (that for  $a \in A$  and  $b \in B$ ,  $T_s^a$  and  $T_s^b$  have  
231 the same distribution) implies that  $sl_a$  has the same distribution as  $sl_b$ . The alternative  
232 hypothesis of greatest interest is that there is no overlap in the  $T_s^a$  and  $T_s^b$  distributions: that  
233  $\mathbb{P}[T_s^a < T_s^b] = 1$ . With this assumption, the arguments assuming fixed  $T_s^A < T_s^B$ , apply for  
234 the conditional distribution of  $sl_s^a - sl_s^b$ , given  $T_s^a$  and  $T_s^b$ . Averaging over  $T_s^a$  and  $T_s^b$  give  
235 that  $\mathbb{P}[sl_b - sl_a > 0] \leq 1/2$  under the null hypothesis and  $\mathbb{P}[sl_b - sl_a > 0] > 1/2$  under the  
236 alternative hypothesis.

237 One difficulty with analyses when the  $T_s^g$  vary within groups is that we have no control  
238 over the alternative hypothesis. The desired alternative conclusion is that  $\mathbb{P}[T_s^a < T_s^b] = 1$   
239 and we have argued above that such an alternative relationship leads to a Mann-Whitney U  
240 test null and alternative hypotheses for  $\widehat{sl}_b - \widehat{sl}_a$ . But suppose now that

$$241 \quad \mathbb{P}[T_s^b - T_s^a > z] > \mathbb{P}[T_s^a - T_s^b > z], \text{ all } z \quad (8)$$

242 This condition is related to the hypothesis of interest but might not be very meaningful. For  
243 instance, if  $\log(T_s^b) \sim N(\mu_B, \sigma^2)$  and  $\log(T_s^a) \sim N(\mu_A, \sigma^2)$  with  $\mu_B > \mu_A$ , (8) holds but if  
244  $\sigma^2$  is large then there is a substantial chance that any given  $T_s^a$  is larger than a given  $T_s^b$ .  
245 In other words, if substantial numbers of proteins in a given group  $A$  have an older origin  
246 than many of the proteins in group  $B$ , then what should we conclude from rejecting the null  
247 hypothesis that the group  $A$  distribution is shifted to be older than the group  $B$  distribution?  
248 More broadly, the rationale for grouping proteins together to test hypotheses about timings  
249 of origin is unclear if the age ranges across proteins in the groups heavily overlap and there  
250 is large variation within them.

251 We now show that (8) can lead to  $\mathbb{P}[\widehat{sl}_b > \widehat{sl}_a] > 1/2$ . Assume for simplicity that  
 252  $\mathbb{P}[r_p(t) = 1] = 1$ . Then the arguments leading to (4) apply with random  $W = (T_s^b - T_s^a)/T_e$   
 253 and exact equality:

$$254 \quad \mathbb{P}[sl_b - sl_a > u] = \mathbb{P}[W > u - U] = \mathbb{P}[T_s^b - T_s^a > T_e(u - U)]$$

$$255 \quad = \mathbb{P}[T_s^b - T_s^a > T_e(u + U)] \quad (9)$$

$$256 \quad \mathbb{P}[sl_a - sl_b > u] = \mathbb{P}[T_s^a - T_s^b > T_e(u + U)] \quad (10)$$

257 where the last equality in (9) and the equality in (10) follows from independence and the  
 258 symmetric distribution of  $U$ . Letting  $Z = T_e(u - U)$ , then

$$259 \quad \mathbb{P}[sl_b - sl_a > u] - \mathbb{P}[sl_a - sl_b > u] = \int_{-\infty}^{\infty} \{\mathbb{P}[T_s^b - T_s^a > z] - \mathbb{P}[T_s^a - T_s^b > z]\} p(z) dz > 0$$

260 It follows as before that  $\mathbb{P}[\widehat{sl}_b > \widehat{sl}_a] > 1/2$ . Since the Mann-Whitney U test or the Chung and  
 261 Romano robust alternative are designed to detect  $\mathbb{P}[\widehat{sl}_b > \widehat{sl}_a] > 1/2$  vs  $\mathbb{P}[\widehat{sl}_b > \widehat{sl}_a] \leq 1/2$ ,  
 262 whatever the cause, rejection could correspond to less meaningful alternatives like those  
 263 discussed above.

264 Another concern arises specifically for groups of genes that were laterally acquired during  
 265 eukaryogenesis from a prokaryotic lineage. As discussed above and shown in Fig. 1, the actual  
 266 stem-length time  $T_{s^*}$  for these genes is less than the stem-length time  $T_s$  for the observed  
 267 tree. Throughout the preceding discussion we have assumed that  $T_{s^*}^g \approx T_s^g$ . Suppose now  
 268 that the two groups  $A$  and  $B$  have different prokaryotic origins and that  $\mathbb{P}[T_{s^*}^B > T_{s^*}^A] = 1$ .  
 269 Will the Mann-Whitney U test be likely to reject in this case? Let  $K_g = T_s^g/T_{s^*}^g \geq 1$ .  
 270 Recall that  $T_s^g > T_{s^*}^g$  is expected because an immediate extant sister group to the actual  
 271 prokaryotic transfer lineage is unlikely to be among the sampled taxa because of extinction.  
 272 If the extinction processes are roughly the same for the two prokaryotic origin groups, then  
 273 it is plausible that  $K_g$  will have the same distribution for the two groups. We thus make the  
 274 additional assumption that the  $K_g$  have the same distribution for the two groups and are  
 275 independent of the rate process below.

276 We now argue that the Mann-Whitney U test is indeed likely to reject when two such  
 277 acquired groups of genes  $A$  and  $B$  have different single prokaryotic origins and origin times  
 278 are well separated:  $\mathbb{P}[T_{s^*}^B > T_{s^*}^A] = 1$ . We condition on fixed  $T_{s^*}^A$  and  $T_{s^*}^B$  in what follows.  
 279 Because the result below holds for all fixed  $T_{s^*}^B$  and  $T_{s^*}^A$ , then averaging with respect to the  
 280 distribution of  $[T_{s^*}^A, T_{s^*}^B]$  gives the result for random  $T_{s^*}^A$  and  $T_{s^*}^B$ .

281 Similarly as when  $T_{s^*} = T_s$  was assumed,  $sl_g = X_g/Y_g$  for  $g \in A$  and  $sl_g = (X_g + V_g)/Y_g$   
 282 for  $g \in B$ , where  $Y_g$  is as in (1) but now

$$283 \quad X_g = \int_{T_e}^{K_g T_{s^*}^A + T_e} r_s^g(t) dt \text{ and } V_g = \int_{K_g T_{s^*}^A + T_e}^{K_g T_{s^*}^B + T_e} r_s^g(t) dt.$$

284 For  $a \in A$  and  $b \in B$ , observe first that, because the  $\{r_b(t)\}$  and  $\{r_a(t)\}$  processes are  
285 probabilistically equivalent, and because  $K_a$  and  $K_b$  have the same distributions, then  $X_b/Y_b$   
286 and  $X_a/Y_a$  have the same distribution. Second, because  $K_g \geq 1$ , the smallest  $V_b/Y_b$  can be  
287 is then  $w = \beta(T_{s^*}^B - T_{s^*}^A)/(\gamma T_e)$ . These two properties were what was used in the arguments  
288 leading to (2)–(5) and so those results hold in this setting. Here (5) gives the conclusion  
289 required for the Mann-Whitney U test, that  $\mathbb{P}[sl_b - sl_a > 0] > 1/2$  and (2) is the key  
290 inequality that can be used, exactly as before, to show (7), that, even with estimation,  
291  $\mathbb{P}[\widehat{sl}_b - \widehat{sl}_a > 0] > 1/2$ .

292 Note that the above assumption that  $K_g$  has the same distribution across groups is  
293 violated for some comparisons. For instance, comparisons of distributions from groups of  
294 acquired genes (where  $T_{s^*}^g \leq T_s^g$  and, possibly, broad ranges of  $T_s^g$  values within the group)  
295 with genes inherited from the asgard archaeon-eukaryote common ancestor or genes that  
296 originate by duplication (for which  $T_{s^*}^g = T_s^g$  in both cases). In the simplest case of fixed  
297  $T_s^g$  values for the genes in an acquired group, the inferred age of that group will be biased  
298 to be older than its true age in comparison with genes inherited from the asgard-eukaryote  
299 common ancestor or groups of duplicated genes.

300 We have shown that validity of the edge length ratio methods introduced by Pittis and  
301 Gabaldón (2016a), and extended by Vosseberg and colleagues (2020) do not require a molec-  
302 ular clock. They can be justified in much more general settings where substitution rates in a  
303 protein stochastically vary over the tree. Indeed, the only restrictions are that the stochastic  
304 substitution rate process is bounded away from 0 and infinity and that genes in groups of  
305 different origins (or functional classes) in a genome are all independently evolving according  
306 to this same process (i.e. the rate process for different genes are probabilistically equiva-  
307 lent). In terms of biological realism, it is this latter assumption that may not always hold.  
308 For example, it is well known that proteins may periodically experience episodes of rapid  
309 adaptive evolution due to acquisition of novel functions and/or loss of ancestral functions  
310 (Studer, Dessailly and Orengo, 2013). If this functional divergence differentially affected  
311 proteins within groups of different origins or functional classes, then stem length distribu-  
312 tions of one group of proteins versus another will likely reflect this episodic shift in rates in  
313 one group, and cannot be used to test if they originated at different times. When applying  
314 these methods, it is therefore important to investigate evidence for systematic differences in  
315 the evolutionary dynamics of one group of proteins versus another.

316 It is also important to select edge lengths from phylogenies for different gene groups to be  
317 compared in the same manner to ensure that no biases are introduced. For example, when  
318 extending the approach to genes duplicated during eukaryogenesis, Vosseberg and colleagues  
319 (2020) were faced with deciding how to deal with the multiple possible edges or paths to

320 LECA nodes created by duplications (Fig. 2). Their approach was to always select the  
 321 minimum of all possible edge or path lengths for calculations of stem lengths or duplication  
 322 lengths (all duplication lengths were calculated as  $dl_g = L_d^g / \text{med}(L_e^g)$ ). For two groups  $D$   
 323 and  $S$  of duplicated or acquired genes (for which stem lengths can include duplicated edges),  
 324 the alternative hypothesis of greatest interest is  $H_{DS}$ :  $\mathbb{P}[T_{di} > T_{sj}] = 1$  for  $d \in D$  and  $s \in S$ ,  
 325 regardless of  $i$  and  $j \in \{1, 2\}$ .

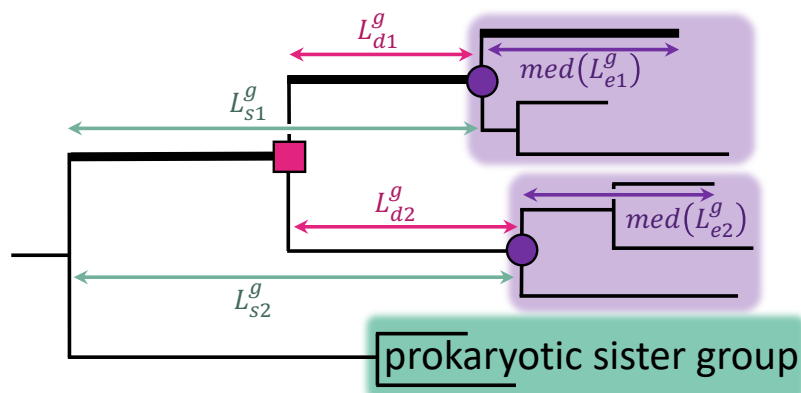

Figure 2: **Example of the multiple possible stem paths and duplication edges in the phylogeny of a protein that has been duplicated during eukaryogenesis.** This gene was acquired by the proto-eukaryote genome from a prokaryotic lineage (green box) and then duplicated (magenta box) prior to LECA (the LECA nodes of each duplicate are shown as purple circles). As a result there are two possible stem paths with lengths  $L_{s1}^g$  and  $L_{s2}^g$  (green arrows), two possible duplication edges with lengths  $L_{d1}^g$  and  $L_{d2}^g$  and two possible median paths within the eukaryote subtrees (purple boxes) with lengths  $\text{med}(L_{e1}^g)$  and  $\text{med}(L_{e2}^g)$ . To calculate stem lengths and duplication lengths, Vosseberg and colleagues (2020) used the edges/paths with minimum values (minimums shown as thicker edges).

326 Assume that evolution is independent post duplication. Then, if all duplicated lengths  
 327 are included in a comparison involving minima, the arguments above apply and the Mann-  
 328 Whitney U test would be likely to reject when  $H_{DS}$  holds. One possible motivation for  
 329 using minima is that it could potentially alleviate bias due to the functional divergence  
 330 phenomenon alluded to above because functional divergence is more likely to have occurred  
 331 in the duplicate with the longer  $L_{di}^g$  over  $i \in \{1, 2\}$ . Unfortunately, taking minimums leads to  
 332 some loss of information and could lead to a bias which we illustrate assuming no functional  
 333 divergence. Similar arguments as those above related to the median path lengths, imply

334 that the Mann-Whitney U test would have substantial probability of rejection whenever  
335  $\mathbb{P}[\min(T_{d1}, T_{d2}) > \min(T_{s1}, T_{s2})] = 1$ . If  $H_{DS}$  holds and evolution is independent, then this  
336 hypothesis will hold, so the approach should work. In less ideal alternative hypothesis  
337 scenarios where there is overlap in the distributions of  $T_{di}$  and  $T_{sj}$ , biases can occur. As an  
338 illustrative example, suppose that  $S$  is a stem-length group of acquired genes, that  $T_e = 1.5$   
339 billion years ago, that  $T_{sj} = 0.4$  billion years and that, independently,  $T_{di} \sim U(0, 1)$ . Then

340 
$$\mathbb{P}[T_{di} > T_{sj}] = \mathbb{P}[T_{di} > 0.4] = 1 - 0.4 = 0.6,$$

341 consistent with longer duplication lengths. But

342 
$$\mathbb{P}[\min(T_{d1}, T_{d2}) > \min(T_{s1}, T_{s2})] = \mathbb{P}[T_{d1} > 0.4, T_{d2} > 0.4] = 0.6^2 = 0.36$$

343 Consequently, based on the Mann-Whitney U test, one would conclude that the age of the  
344 duplicated group of genes  $D$  tended to be less than the acquired genes  $S$  when, in fact, 60%  
345 of the duplication group genes,  $D$ , duplicated prior to their acquisition.

346 Another complication arises in the comparison of duplication groups and stem-length  
347 groups. For duplication groups, duplication lengths are all minima. The stem-length groups,  
348 however, are usually a mix of stem lengths, some of which are chosen to be minima (Fig. 2)  
349 and some of which did not require a minimum (Fig. 1) (Vosseberg *et al.* 2020). In this case  
350 biases might arise even under the strong hypothesis,  $\mathbb{P}[\min(T_{d1}, T_{d2}) > \min(T_{s1}, T_{s2})] = 1$  for  
351  $d \in D$  and  $s \in S$ , making it difficult to reject when  $H_{DS}$  holds. Such problems can be averted  
352 by including all duplication and stem lengths rather than minima. There are potentially  
353 other ways of addressing functional divergence that may be less likely to introduce bias  
354 (e.g., identifying functionally divergent sites using methods reviewed in Studer, Dessailly  
355 and Orengo (2013) and removing them prior to analysis).

356 In summary, although there are a number of caveats, if the assumptions of the methods  
357 we have elaborated above are met by the data, these edge length ratio methods have the  
358 potential to provide important new insights into the roles of gene duplication and gene  
359 invention in different cellular systems and clarify the relative contributions of host, symbiont  
360 and lateral transfers to a lineage of interest.

## 361 Acknowledgements

362 This research was supported a grant (Award ID: 735923LPI) awarded to A.J.R. and E.S.  
363 as part of the Moore-Simons Project on the Origin of the Eukaryotic Cell. E.S. and A.J.R.  
364 also acknowledge partial support for this work from Discovery grants awarded to them by  
365 the Natural Sciences and Engineering Research Council of Canada. A.J.R. acknowledges the  
366 Allan Wilson Centre in New Zealand for sabbatical support received in 2006 when some of  
367 these ideas were first discussed.

368 **References**

- 369 Bickel, P.J. and Doksum, K.A. (2007). Mathematical Statistics: Basic ideas and selected  
370 topics. Pearson, New Jersey.
- 371 Bromham, L., Duchne, S., Hua, X., Ritchie, A.M., Duchne, D.A., and Ho, S.Y.W. (2018).  
372 Bayesian molecular dating: opening up the black box. *Biol. Rev. Camb. Philos. Soc.*  
373 93, 1165–1191.
- 374 Chung E.Y. and Romano, J.P. (2015). Asymptotically valid and exact permutation tests  
375 based on two-sample U-statistics. *J. Statist. Plann. and Inf.* 168:97–105.
- 376 Dacks, J.B., Field, M.C., Buick, R., Eme, L., Gribaldo, S., Roger, A.J., Brochier-Armanet,  
377 C., and Devos, D.P. (2016). The changing view of eukaryogenesis - fossils, cells, lineages  
378 and how they all come together. *J. Cell Sci.* 129, 3695–3703.
- 379 Eme, L., Spang, A., Lombard, J., Stairs, C.W., and Ettema, T.J.G. (2017). Archaea and  
380 the origin of eukaryotes. *Nat. Rev. Microbiol.* 15, 711–723.
- 381 Kasuya, E. (2001). Mann-Whitney U test when variances are unequal. *An. Behav.*  
382 61:1247–1249.
- 383 Lane N. and Martin W.F. (2010) The energetics of genome complexity *Nature* 467:929–934.
- 384 Martin, W.F., Roettger, M., Ku, C., Garg, S.G., Nelson-Sathi, S., and Landan, G. (2017).  
385 Late Mitochondrial Origin Is an Artifact. *Genome Biol. Evol.* 9:373-379.
- 386 Pittis, A.A. and Gabaldón, T. (2016a). Late acquisition of mitochondria by a host with  
387 chimaeric prokaryotic ancestry. *Nature.* 531:101-104.
- 388 Pittis, A.A. and Gabaldón, T. (2016b) On phylogenetic branch lengths distribution and  
389 the late acquisition of mitochondria. *bioRxiv doi: <https://doi.org/10.1101/064873>*
- 390 Porter, S.M. (2020). Insights into eukaryogenesis from the fossil record. *Interface Focus* 10,  
391 20190105.
- 392 Rochette, N.C., Brochier-Armanet, C., and Gouy, M. (2014). Phylogenomic test of the  
393 hypotheses for the evolutionary origin of eukaryotes. *Mol. Biol. Evol.* 31:832-845.
- 394 Roger, A.J., Muñoz-Gómez, S. and Kamikawa, R. (2017). The origin and diversification of  
395 mitochondria. *Curr. Biol.* 27:R1177-R1192.

- 396 Vosseberg, J., van Hooff, J.J.E, Marcet-Houben, M., van Vlimmeren, A., van Wijk, L.M.,  
397 Gabaldón, T. and Snel, B. (2020). Timing the origin of eukaryotic cellular complexity  
398 with ancient duplications. *Nat. Ecol. Evol.* 5:92-100.
- 399 Studer, R.A., Dessailly, B.H., and Orengo, C.A. (2013). Residue mutations and their  
400 impact on protein structure and function: detecting beneficial and pathogenic changes.  
401 *Biochem. J.* 449:581-594.
